# Supplementary material for: PERK-mediated translational control is required for collagen secretion in chondrocytes
Source: PubMed Central journal article supplement (PMC5768675; doi:10.1038/s41598-017-19052-9), 2018-01-15
Supplement: 41598_2017_19052_MOESM1_ESM.pdf [file 41598_2017_19052_MOESM1_ESM.pdf]

## PERK-mediated translational control is required for collagen secretion in chondrocytes

Satoshi Hisanaga<sup>1,4</sup>, Masato Miyake<sup>1,2,3</sup>, Shusuke Taniuchi<sup>1,2</sup>, Miho Oyadomari<sup>1,2</sup>, Masatoshi Morimoto<sup>1</sup>, Ryosuke Sato<sup>1</sup>, Jun Hirose<sup>5</sup>, Hiroshi Mizuta<sup>4</sup> and Seiichi Oyadomari<sup>1,2,3\*</sup>

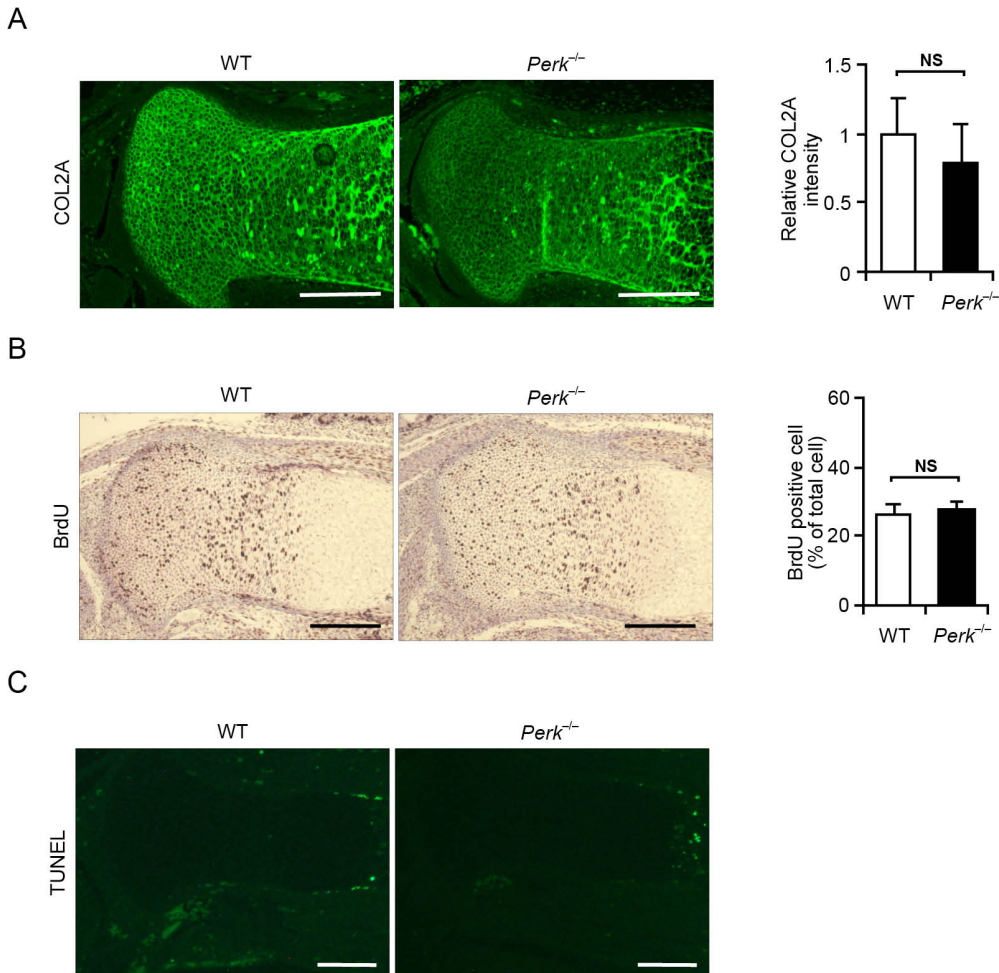

### Supplemental figure 1

(A) Representative fluorescence micrographs of immunohistochemistry for COL2A1 of tibial sections from wild-type or *Perk*<sup>-/-</sup> mice at 16.5 dpc. Scale bar, 200  $\mu$ m. Relative fluorescence intensity was presented as the mean fold change  $\pm$  SD versus that of wild-type mice ( $n = 4$  technical replicates, NS = not significant).

(B) Representative micrographs of immunohistochemistry for bromodeoxyuridine (BrdU) in tibial sections from wild-type or *Perk*<sup>-/-</sup> mice at 16.5 dpc. The sections were counterstained using hematoxylin. Scale bar, 200  $\mu$ m. Ratio of BrdU-positive cells divided by the total number of cells was expressed as the mean  $\pm$  SD ( $n = 4$  technical replicates, NS = not significant).

(C) Representative micrographs of TUNEL staining of tibial sections from wild-type or *Perk*<sup>-/-</sup> mice at 16.5 dpc. Scale bar, 200  $\mu$ m.

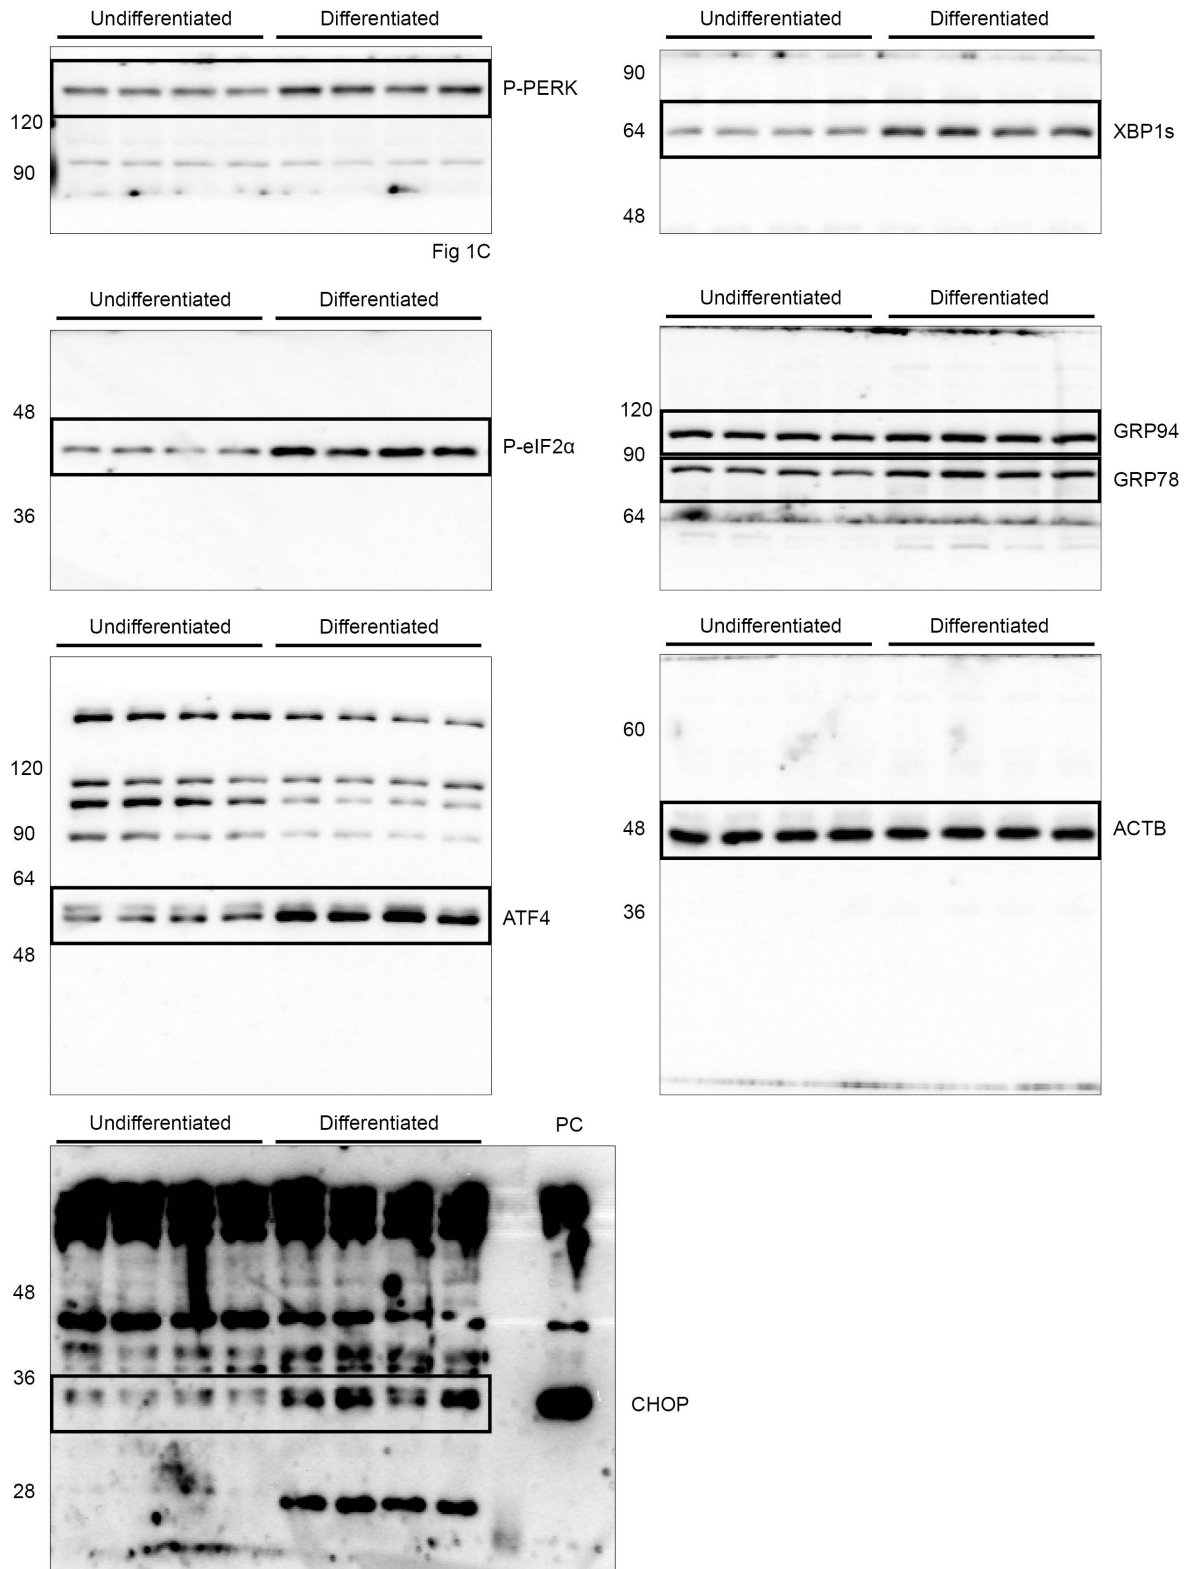

ATDC5 cell treated with 2  $\mu$ g/ml tunicamycin was used as a positive control (PC).

Supplementary Figure 2. Uncropped images for immunoblots for Fig 1C.

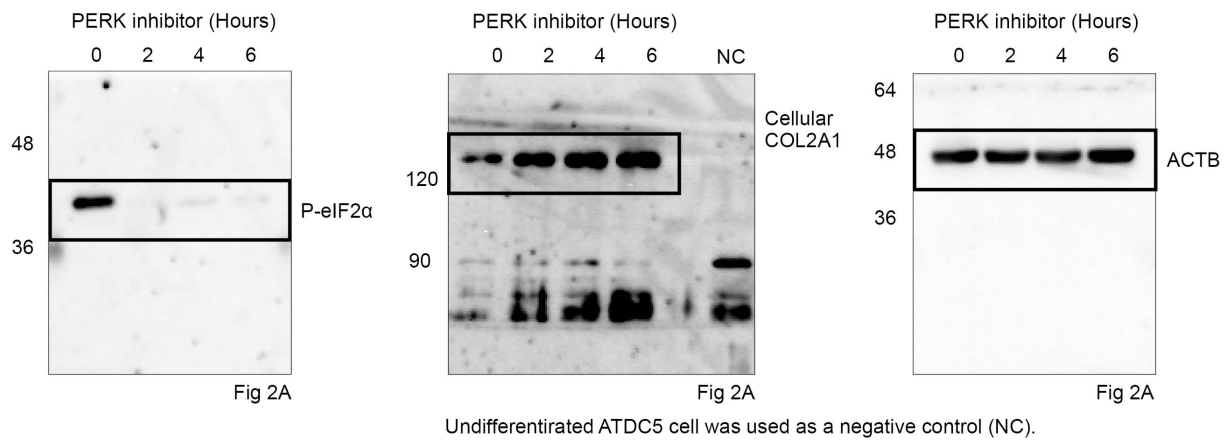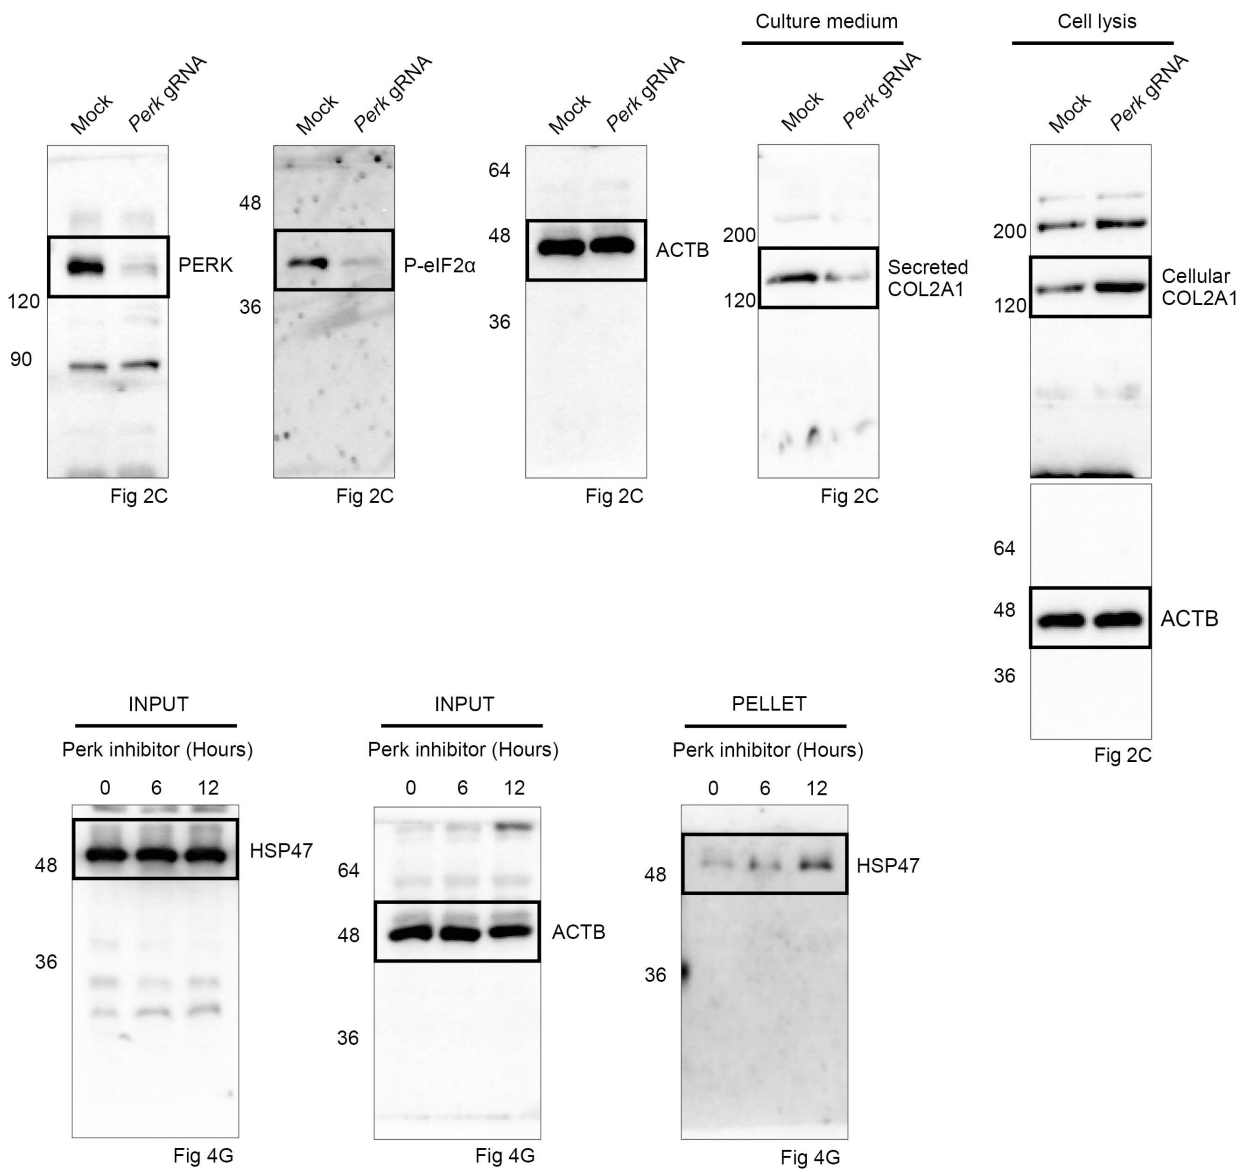

Supplementary Figure 3. Uncropped images for immunoblots for Fig 2A, 2C and 4G.
